# Supplementary material for: Interactive effects of neonatal exposure to monosodium glutamate and aspartame on glucose homeostasis
Source: PubMed Central journal article supplement (PMC3466134; doi:10.1186/1743-7075-9-58), 2012-06-14

Supplemental Figure 1.

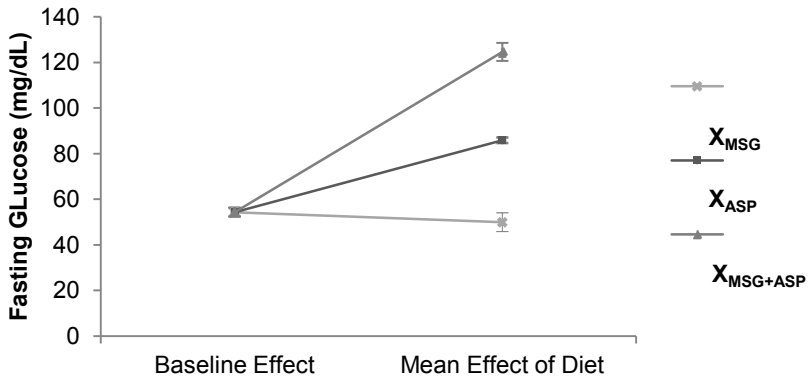

Supplement: 1743-7075-9-58-S1.pdf [file 1743-7075-9-58-S1.pdf]
