# Supplementary material for: Interactive effects of neonatal exposure to monosodium glutamate and aspartame on glucose homeostasis
Source: PubMed Central journal article supplement (PMC3466134; doi:10.1186/1743-7075-9-58), 2012-06-14
Supplement: 1743-7075-9-58-S2.pdf [file 1743-7075-9-58-S2.pdf]

**Supplemental Table 1 A.** Correlation analysis of insulin resistance parameters and body characteristics in mice in CONTROL diet group.

|                                           | <i>Males</i> | 6 Week<br>Body<br>Weight<br>(g) | 17 Week<br>Body<br>Weight<br>(g) | Weight<br>Change<br>(%) | Visceral<br>Fat (g) | Fasting<br>Glucose<br>(mg/dL) | T-CHOL<br>(mg/dL) | HDL-C<br>(mg/dL) | TG<br>(mg/dL) | Random<br>Glucose<br>(mg/dL) | AUC <sub>GLUCO</sub><br>SE(mg/dL.<br>min) | K <sub>ITT</sub><br>(%/min) | T <sub>1/2</sub> <sub>GLUCOSE</sub><br>(min) |
|-------------------------------------------|--------------|---------------------------------|----------------------------------|-------------------------|---------------------|-------------------------------|-------------------|------------------|---------------|------------------------------|-------------------------------------------|-----------------------------|----------------------------------------------|
| Females                                   |              |                                 |                                  |                         |                     |                               |                   |                  |               |                              |                                           |                             |                                              |
| 6 Week Body Weight (g)                    |              |                                 | <b>0.809**</b>                   | -0.389                  | 0.325               | -0.420                        | -0.431            | 0.369            | 0.269         | 0.130                        | -0.055                                    | 0.310                       | -0.088                                       |
| 17 Week Body Weight (g)                   |              | <b>0.518*</b>                   |                                  | 0.227                   | 0.184               | -0.356                        | -0.351            | 0.428            | <b>0.506*</b> | 0.175                        | -0.054                                    | 0.336                       | -0.075                                       |
| Weight Change (%)                         |              | <b>-0.614**</b>                 | 0.357                            |                         | -0.260              | 0.129                         | 0.166             | 0.061            | 0.347         | 0.068                        | 0.021                                     | 0.016                       | 0.022                                        |
| Visceral Fat (g)                          |              | 0.351                           | 0.412                            | 0.011                   |                     | 0.267                         | <b>-0.521*</b>    | 0.166            | 0.053         | 0.362                        | 0.263                                     | -0.023                      | -0.135                                       |
| Fasting Glucose (mg/dL)                   |              | <b>-0.528*</b>                  | -0.277                           | 0.320                   | -0.096              |                               | 0.247             | 0.092            | -0.065        | 0.433                        | 0.117                                     | -0.005                      | 0.054                                        |
| T-CHOL (mg/dL)                            |              | -0.250                          | -0.178                           | 0.111                   | 0.053               | 0.302                         |                   | -0.412           | -0.174        | 0.007                        | -0.288                                    | -0.128                      | -0.027                                       |
| HDL-C (mg/dL)                             |              | 0.045                           | 0.148                            | 0.088                   | -0.024              | 0.400                         | -0.001            |                  | <b>0.519*</b> | 0.436                        | 0.140                                     | 0.417                       | 0.009                                        |
| TG (mg/dL)                                |              | -0.302                          | -0.274                           | 0.076                   | -0.190              | <b>0.574*</b>                 | 0.039             | 0.270            |               | 0.033                        | -0.045                                    | 0.353                       | 0.069                                        |
| Random Glucose (mg/dL)                    |              | -0.492                          | -0.551                           | 0.152                   | 0.641               | 0.532                         | 0.499             | 0.721            | 0.426         |                              | 0.335                                     | 0.231                       | -0.260                                       |
| AUC <sub>GLUCOSE</sub> (mg/dL.min)        |              | -0.255                          | -0.197                           | 0.116                   | <b>0.999*</b>       | 0.757                         | 0.627             | 0.783            | 0.544         | 0.427                        |                                           | -0.381                      | <b>0.469*</b>                                |
| K <sub>ITT</sub> (%/min)                  |              | -0.430                          | -0.278                           | 0.296                   | -0.725              | -0.240                        | -0.006            | -0.159           | -0.396        | <b>0.531*</b>                | -0.399                                    |                             | <b>-0.688**</b>                              |
| T <sub>1/2</sub> <sub>GLUCOSE</sub> (min) |              | -0.010                          | -0.134                           | -0.105                  | 0.970               | 0.528                         | 0.352             | 0.495            | 0.603         | -0.393                       | <b>0.554*</b>                             | <b>-0.761**</b>             |                                              |

Significant correlations are indicated in **bold** by \*\* at the 0.01 level and \* at the 0.05 level (2-tailed).Correlations in males are indicated in *italics*.

**Supplemental Table 1B.** Correlation analysis of insulin resistance parameters, MSG intake and body characteristics in mice in MSG diet group.

|                                           | <i>Males</i> | MSG Intake (mg/kg) | 6 Week Body Weight (g) | 17 Week Body Weight (g) | Weight Change (%) | Visceral Fat (g) | Fasting Glucose (mg/dL) | T-CHOL (mg/dL) | HDL-C (mg/dL)  | TG (mg/dL) | Random Glucose (mg/dL) | AUC <sub>GLUCO</sub> <sub>SE</sub> (mg/dL.min) | K <sub>ITT</sub> (%/min) | T <sub>1/2</sub> <sub>GLUCOSE</sub> (min) |
|-------------------------------------------|--------------|--------------------|------------------------|-------------------------|-------------------|------------------|-------------------------|----------------|----------------|------------|------------------------|------------------------------------------------|--------------------------|-------------------------------------------|
| Females                                   |              |                    |                        |                         |                   |                  |                         |                |                |            |                        |                                                |                          |                                           |
| MSG Intake (mg/kg)                        |              |                    | <b>0.834**</b>         | <b>0.627*</b>           | <b>-0.725**</b>   | <b>0.522*</b>    | <b>0.616*</b>           | -0.338         | -0.029         | -0.065     | 0.285                  | 0.008                                          | 0.076                    | 0.039                                     |
| 6 Week Body Weight (g)                    |              | <b>0.770*</b>      |                        | <b>0.627*</b>           | <b>-0.725**</b>   | <b>0.522*</b>    | <b>0.615*</b>           | -0.338         | -0.029         | -0.065     | 0.285                  | 0.007                                          | 0.099                    | -0.132                                    |
| 17 Week Body Weight (g)                   |              | <b>0.762**</b>     | <b>0.761**</b>         |                         | 0.078             | <b>0.563*</b>    | <b>0.586*</b>           | -0.343         | -0.146         | -0.275     | 0.149                  | -0.193                                         | 0.056                    | -0.187                                    |
| Weight Change (%)                         |              | <b>-0.698**</b>    | <b>-0.698**</b>        | -0.070                  |                   | -0.204           | -0.285                  | 0.337          | 0.019          | -0.044     | -0.017                 | -0.084                                         | -0.033                   | -0.010                                    |
| Visceral Fat (g)                          |              | <b>0.510*</b>      | <b>0.510*</b>          | 0.465                   | -0.273            |                  | <b>0.781**</b>          | -0.206         | 0.072          | -0.140     | 0.350                  | -0.005                                         | 0.180                    | -0.173                                    |
| Fasting Glucose (mg/dL)                   |              | 0.328              | 0.328                  | 0.284                   | -0.303            | <b>0.542*</b>    |                         | -0.191         | -0.042         | -0.269     | 0.259                  | 0.013                                          | 0.006                    | -0.193                                    |
| T-CHOL (mg/dL)                            |              | 0.028              | 0.027                  | 0.326                   | 0.103             | <b>0.555*</b>    | 0.089                   |                | 0.399          | 0.140      | 0.264                  | 0.216                                          | -0.190                   | 0.250                                     |
| HDL-C (mg/dL)                             |              | -0.133             | -0.133                 | -0.190                  | 0.141             | -0.019           | -0.166                  | -0.203         |                | 0.261      | -0.089                 | -0.336                                         | -0.070                   | 0.178                                     |
| TG (mg/dL)                                |              | -0.224             | -0.223                 | 0.183                   | 0.375             | -0.368           | -0.227                  | 0.002          | 0.252          |            | -0.354                 | 0.149                                          | <b>-0.535*</b>           | <b>0.583*</b>                             |
| Random Glucose (mg/dL)                    |              | 0.318              | 0.318                  | 0.228                   | -0.274            | -0.043           | 0.043                   | -0.190         | -0.393         | -0.242     |                        | <b>0.514*</b>                                  | <b>0.797**</b>           | <b>-0.707**</b>                           |
| AUC <sub>GLUCOSE</sub> (mg/dL.min)        |              | 0.329              | 0.329                  | 0.335                   | -0.057            | 0.082            | <b>0.550*</b>           | -0.155         | -0.113         | -0.088     | 0.420                  |                                                | 0.274                    | -0.233                                    |
| K <sub>ITT</sub> (%/min)                  |              | 0.435              | 0.435                  | 0.099                   | -0.387            | -0.086           | 0.059                   | -0.373         | <b>-0.582*</b> | -0.397     | <b>0.653**</b>         | 0.310                                          |                          | <b>-0.904**</b>                           |
| T <sub>1/2</sub> <sub>GLUCOSE</sub> (min) |              | -0.342             | -0.342                 | -0.229                  | 0.090             | 0.199            | 0.272                   | 0.220          | 0.315          | 0.242      | <b>-0.457*</b>         | -0.124                                         | <b>-0.742**</b>          |                                           |

Significant correlations are indicated in **bold** by \*\* at the 0.01 level and \* at the 0.05 level (2-tailed).

Correlations in males are indicated in *italics*.

**Supplemental Table 1C.** Correlation analysis of insulin resistance parameters and body characteristics in mice in ASP diet group.

|                                           | <i>Males</i> | ASP Intake (mg/kg) | 6 Week Body Weight (g) | 17 Week Body Weight (g) | Weight Change (%) | Visceral Fat (g) | Fasting Glucose (mg/dL) | T-CHOL (mg/dL) | HDL-C (mg/dL) | TG (mg/dL)      | Random Glucose (mg/dL) | AUC <sub>GLUCO</sub> <sub>SE</sub> (mg/dL.min) | K <sub>ITT</sub> (%/min) | T <sub>1/2</sub> <sub>GLUCOSE</sub> (min) |
|-------------------------------------------|--------------|--------------------|------------------------|-------------------------|-------------------|------------------|-------------------------|----------------|---------------|-----------------|------------------------|------------------------------------------------|--------------------------|-------------------------------------------|
| Females                                   |              |                    |                        |                         |                   |                  |                         |                |               |                 |                        |                                                |                          |                                           |
| ASP Intake (mg/kg)                        |              |                    | <b>0.486*</b>          | <b>0.682**</b>          | -0.422            | 0.043            | -0.217                  | -0.204         | -0.058        | <b>0.628**</b>  | -0.319                 | -0.380                                         | -0.175                   | 0.356                                     |
| 6 Week Body Weight (g)                    |              | -0.243             |                        | <b>0.680**</b>          | -0.424            | 0.034            | -0.219                  | -0.211         | -0.049        | <b>0.637**</b>  | -0.329                 | -0.391                                         | -0.165                   | 0.369                                     |
| 17 Week Body Weight (g)                   |              | <b>0.464*</b>      | <b>0.461*</b>          |                         | 0.376             | 0.101            | 0.351                   | -0.075         | 0.177         | 0.165           | 0.247                  | 0.030                                          | -0.082                   | 0.074                                     |
| Weight Change (%)                         |              | -0.371             | -0.374                 | <b>0.650**</b>          |                   | 0.075            | <b>0.717**</b>          | 0.162          | 0.293         | <b>-0.599**</b> | <b>0.715**</b>         | <b>0.528*</b>                                  | 0.111                    | -0.353                                    |
| Visceral Fat (g)                          |              | 0.103              | 0.106                  | -0.119                  | -0.185            |                  | -0.083                  | -0.022         | <b>0.519*</b> | 0.164           | 0.083                  | 0.104                                          | 0.139                    | -0.041                                    |
| Fasting Glucose (mg/dL)                   |              | 0.353              | 0.352                  | <b>0.631**</b>          | 0.352             | -0.068           |                         | -0.320         | -0.041        | <b>-0.525*</b>  | <b>0.598**</b>         | 0.336                                          | 0.196                    | -0.247                                    |
| T-CHOL (mg/dL)                            |              | 0.043              | 0.040                  | 0.105                   | 0.073             | -0.112           | 0.188                   |                | 0.097         | -0.380          | 0.439                  | <b>0.487*</b>                                  | -0.128                   | -0.277                                    |
| HDL-C (mg/dL)                             |              | 0.417              | 0.419                  | 0.103                   | -0.253            | 0.392            | 0.207                   | -0.101         |               | 0.047           | 0.048                  | 0.208                                          | -0.061                   | 0.255                                     |
| TG (mg/dL)                                |              | -0.330             | -0.327                 | -0.342                  | -0.086            | 0.242            | -0.420                  | -0.276         | -0.084        |                 | <b>-0.701**</b>        | <b>-0.606**</b>                                | -0.081                   | 0.448                                     |
| Random Glucose (mg/dL)                    |              | -0.031             | -0.033                 | <b>0.674**</b>          | <b>0.736**</b>    | -0.226           | <b>0.738**</b>          | 0.310          | -0.177        | -0.251          |                        | <b>0.793**</b>                                 | -0.028                   | -0.349                                    |
| AUC <sub>GLUCOSE</sub> (mg/dL.min)        |              | -0.088             | -0.090                 | 0.258                   | 0.343             | -0.001           | -0.081                  | 0.427          | -0.218        | -0.234          | 0.297                  |                                                | <b>-0.464*</b>           | 0.042                                     |
| K <sub>ITT</sub> (%/min)                  |              | 0.132              | 0.133                  | 0.067                   | -0.033            | 0.406            | <b>0.477*</b>           | 0.236          | 0.296         | -0.284          | 0.383                  | -0.075                                         |                          | <b>-0.623**</b>                           |
| T <sub>1/2</sub> <sub>GLUCOSE</sub> (min) |              | -0.037             | -0.038                 | -0.025                  | -0.006            | -0.354           | -0.415                  | -0.333         | -0.216        | 0.180           | -0.434                 | 0.012                                          | <b>-0.960**</b>          |                                           |

Significant correlations are indicated in **bold** by \*\* at the 0.01 level and \* at the 0.05 level (2-tailed).Correlations in males are indicated in *italics*.

**Supplemental Table 1D.** Correlation analysis of insulin resistance parameters and body characteristics in mice in MSG+ASP diet group.

|                                           | <i>Males</i> | ASP Intake (mg/kg) | MSG Intake (mg/kg) | 6 Week Body Weight (g) | 17 Week Body Weight (g) | Weight Change (%) | Visceral Fat (g) | Fasting Glucose (mg/dL) | T-CHOL (mg/dL)  | HDL-C (mg/dL) | TG (mg/dL)    | Random Glucose (mg/dL) | AUC <sub>GLUCOSE</sub> SE (mg/dL.min) | K <sub>ITT</sub> (%/min) | T <sub>1/2</sub> <sub>GLUCOSE</sub> (min) |
|-------------------------------------------|--------------|--------------------|--------------------|------------------------|-------------------------|-------------------|------------------|-------------------------|-----------------|---------------|---------------|------------------------|---------------------------------------|--------------------------|-------------------------------------------|
| Females                                   |              |                    |                    |                        |                         |                   |                  |                         |                 |               |               |                        |                                       |                          |                                           |
| ASP Intake (mg/kg)                        |              |                    | <b>0.999**</b>     | <i>0.416</i>           | <i>0.316</i>            | <i>-0.309</i>     | <i>-0.095</i>    | <b>0.531*</b>           | <i>-0.235</i>   | <i>-0.211</i> | <i>-0.280</i> | <i>-0.187</i>          | <i>-0.057</i>                         | <i>0.206</i>             | <i>-0.403</i>                             |
| MSG Intake (mg/kg)                        |              | <b>0.999**</b>     |                    | <i>0.416</i>           | <i>0.368</i>            | <i>-0.308</i>     | <i>-0.093</i>    | <b>0.532*</b>           | <i>-0.236</i>   | <i>-0.211</i> | <i>-0.280</i> | <i>-0.185</i>          | <i>-0.056</i>                         | <i>0.210</i>             | <i>-0.406</i>                             |
| 6 Week Body Weight (g)                    |              | <b>0.788**</b>     | <b>0.788**</b>     |                        | <i>0.368</i>            | <i>-0.308</i>     | <i>-0.093</i>    | <b>0.532*</b>           | <i>-0.237</i>   | <i>-0.211</i> | <i>-0.281</i> | <i>-0.185</i>          | <i>-0.056</i>                         | <i>0.209</i>             | <i>-0.406</i>                             |
| 17 Week Body Weight (g)                   |              | <b>0.752**</b>     | <b>0.752**</b>     | <b>0.752**</b>         |                         | <b>0.771**</b>    | <b>0.511*</b>    | <b>0.644**</b>          | <i>-0.289</i>   | <i>0.022</i>  | <i>0.027</i>  | <i>0.201</i>           | <i>0.415</i>                          | <i>-0.042</i>            | <i>0.040</i>                              |
| Weight Change (%)                         |              | <b>-0.488*</b>     | <b>-0.488*</b>     | <b>-0.488*</b>         | <i>0.208</i>            |                   | <b>0.581*</b>    | <i>0.291</i>            | <i>-0.132</i>   | <i>0.179</i>  | <i>0.223</i>  | <i>0.336</i>           | <b>0.478*</b>                         | <i>-0.195</i>            | <i>0.320</i>                              |
| Visceral Fat (g)                          |              | <b>0.671**</b>     | <b>0.671**</b>     | <b>0.671**</b>         | <b>0.523*</b>           | <i>-0.393</i>     |                  | <i>0.040</i>            | <i>0.231</i>    | <b>0.523*</b> | <b>0.535*</b> | <i>-0.068</i>          | <i>0.060</i>                          | <i>0.030</i>             | <i>-0.096</i>                             |
| Fasting Glucose (mg/dL)                   |              | <i>-0.298</i>      | <i>-0.296</i>      | <i>-0.297</i>          | <i>0.095</i>            | <b>0.556*</b>     | <i>-0.222</i>    |                         | <b>-0.700**</b> | <i>-0.212</i> | <i>-0.072</i> | <i>0.171</i>           | <i>0.456</i>                          | <i>0.469</i>             | <i>-0.428</i>                             |
| T-CHOL (mg/dL)                            |              | <i>0.324</i>       | <i>0.324</i>       | <i>0.323</i>           | <i>0.083</i>            | <i>-0.387</i>     | <i>0.270</i>     | <i>-0.221</i>           |                 | <i>0.292</i>  | <i>0.280</i>  | <i>0.090</i>           | <i>-0.338</i>                         | <i>-0.312</i>            | <i>0.243</i>                              |
| HDL-C (mg/dL)                             |              | <i>-0.159</i>      | <i>-0.159</i>      | <i>-0.160</i>          | <i>-0.384</i>           | <i>-0.268</i>     | <i>-0.328</i>    | <i>-0.355</i>           | <i>0.088</i>    |               | <i>0.353</i>  | <i>0.068</i>           | <i>-0.035</i>                         | <i>-0.257</i>            | <i>0.273</i>                              |
| TG (mg/dL)                                |              | <i>0.272</i>       | <i>0.270</i>       | <i>0.270</i>           | <i>0.279</i>            | <i>-0.025</i>     | <i>-0.262</i>    | <i>-0.239</i>           | <i>0.402</i>    | <i>0.269</i>  |               | <i>-0.069</i>          | <i>0.140</i>                          | <i>-0.373</i>            | <i>0.426</i>                              |
| Random Glucose (mg/dL)                    |              | <b>0.596**</b>     | <b>0.596**</b>     | <b>0.596**</b>         | <i>0.378</i>            | <i>-0.397</i>     | <b>0.676**</b>   | <i>-0.047</i>           | <i>0.373</i>    | <i>-0.200</i> | <i>-0.068</i> |                        | <i>0.390</i>                          | <i>0.115</i>             | <i>-0.125</i>                             |
| AUC <sub>GLUCOSE</sub> (mg/dL.min)        |              | <b>0.462*</b>      | <b>0.462*</b>      | <b>0.462*</b>          | <i>0.233</i>            | <i>-0.387</i>     | <i>0.492</i>     | <i>0.030</i>            | <i>0.202</i>    | <i>-0.134</i> | <i>-0.330</i> | <i>0.358</i>           |                                       | <b>-0.719*</b>           | <i>0.548</i>                              |
| K <sub>ITT</sub> (%/min)                  |              | <i>0.198</i>       | <i>0.198</i>       | <i>0.198</i>           | <i>0.270</i>            | <i>0.066</i>      | <i>0.114</i>     | <i>-0.130</i>           | <i>0.137</i>    | <i>0.208</i>  | <i>0.309</i>  | <i>0.336</i>           | <b>-0.469*</b>                        |                          | <b>-0.851**</b>                           |
| T <sub>1/2</sub> <sub>GLUCOSE</sub> (min) |              | <i>0.114</i>       | <i>0.114</i>       | <i>0.114</i>           | <i>0.023</i>            | <i>-0.148</i>     | <i>0.132</i>     | <i>0.082</i>            | <i>0.250</i>    | <i>-0.050</i> | <i>-0.300</i> | <i>-0.022</i>          | <b>0.820**</b>                        | <b>-0.682**</b>          |                                           |

Significant correlations are indicated in **bold** by \*\* at the 0.01 level and \* at the 0.05 level (2-tailed).Correlations in males are indicated in *italics*.
